# Supplementary material for: Coping with Conflict: Short-Term Anxiolytic Medication Use Amidst National Stress in Israel
Source: bioRxiv or medRxiv preprint supplement (doi:10.1101/2024.10.04.24314902), 2024-10-04
Supplement: Supplementary file [file media-1.pdf]

# Coping with Conflict: Short-Term Anxiolytic Medication Use Amidst National Stress in Israel

## Supplementary material

**Figure S1.** Forest Plot of HRs and 95% confidence intervals, secondary analyses.

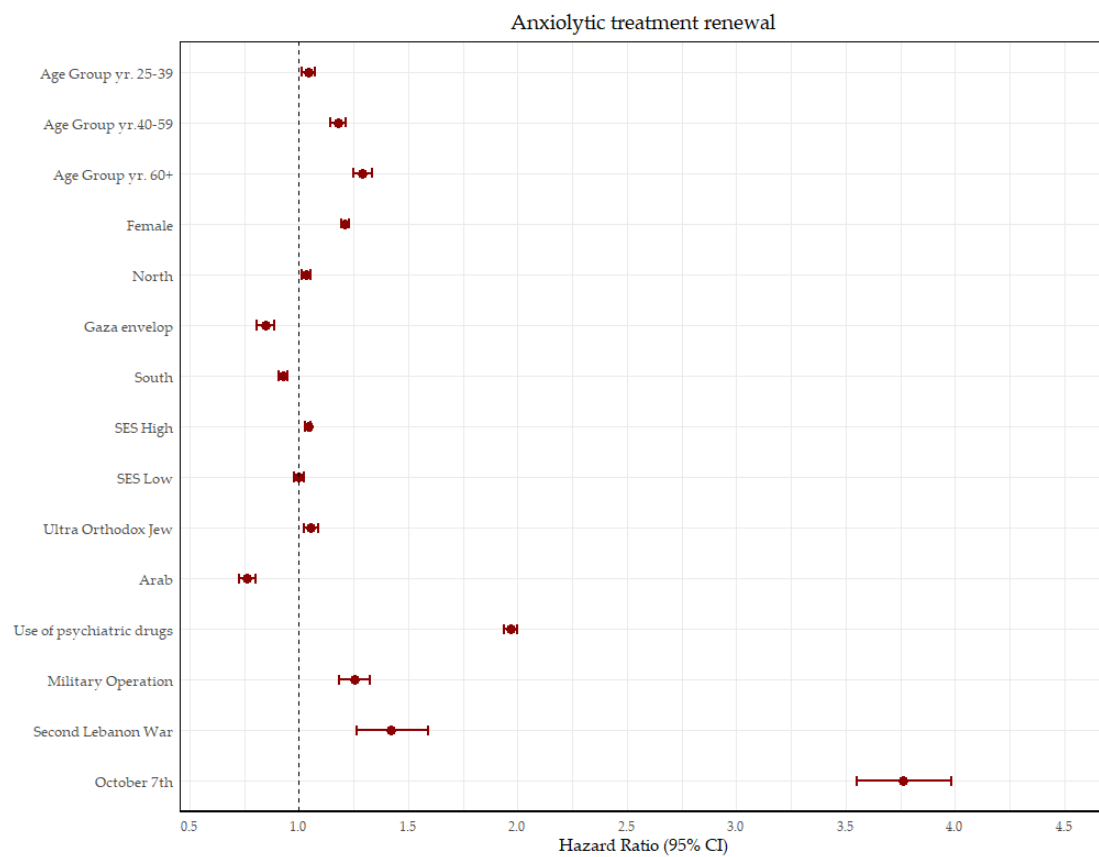

SES - socioeconomic status.

**Table S1.** Cox regression analysis with adjusted Hazard Ratios (HRs) for first purchase of anxiolytic medications (primary analysis) between 2006-2024.

|                                         | Variable               | Category           | HR     | P-value     | 95% CI      |
|-----------------------------------------|------------------------|--------------------|--------|-------------|-------------|
| Baseline                                | Age group, yr.         | 25-39              | 1.25   | <0.001      | 1.22 - 1.29 |
|                                         |                        | 40-59              | 1.68   | <0.001      | 1.63 - 1.72 |
|                                         |                        | 60+                | 2.02   | <0.001      | 1.95 - 2.09 |
|                                         |                        | 21-24              | Ref    |             |             |
|                                         | Biological sex         | Female             | 1.32   | <0.001      | 1.3 - 1.33  |
|                                         |                        | Male               | Ref    |             |             |
|                                         | District               | North              | 1.04   | <0.001      | 1.02 - 1.05 |
|                                         |                        | South              | 0.89   | <0.001      | 0.88 - 0.91 |
|                                         |                        | Gaza envelope      | 0.80   | <0.001      | 0.77 - 0.82 |
|                                         |                        | Center             | Ref    |             |             |
|                                         | SES                    | Low                | 0.96   | <0.001      | 0.95 - 0.98 |
|                                         |                        | Medium             | Ref    |             |             |
|                                         |                        | High               | 1.02   | 0.004       | 1.01 - 1.03 |
|                                         | Socio-religious sector | Ultra-Orthodox Jew | 0.95   | <0.001      | 0.93 - 0.97 |
|                                         |                        | Arab               | 0.74   | <0.001      | 0.72 - 0.76 |
| General Jewish                          |                        | Ref                |        |             |             |
| Use of psychiatric drugs                | Yes                    | 3.29               | <0.001 | 3.26 - 3.33 |             |
|                                         | No                     | Ref                |        |             |             |
| Armed conflict                          | Second Lebanon War     | 1.27               | 0.011  | 1.06 - 1.52 |             |
|                                         | Military operation     | 1.14               | 0.002  | 1.05 - 1.23 |             |
|                                         | October 7th            | 3.04               | <0.001 | 2.80 - 3.30 |             |
| Interaction with the Second Lebanon War | Biological sex         | Female             | 1.15   | 0.14        | 0.96 - 1.37 |
|                                         |                        | Male               | Ref    |             |             |
|                                         | District               | North              | 1.39   | 0.003       | 1.12 - 1.72 |
|                                         |                        | South              | 0.84   | 0.290       | 0.61 - 1.16 |
|                                         |                        | Gaza envelope      | 0.75   | 0.400       | 0.39 - 1.46 |
|                                         |                        | Center             | Ref    |             |             |
|                                         | Socio-religious sector | Ultra-Orthodox Jew | 0.92   | 0.634       | 0.55 - 1.18 |
|                                         |                        | Arab               | 1.05   | 0.822       | 0.54 - 1.45 |
|                                         |                        | General Jewish     | Ref    |             |             |
| Interaction with Military operation     | Biological sex         | Female             | 1.26   | <0.001      | 1.16 - 1.37 |
|                                         |                        | Male               | Ref    |             |             |
|                                         | District               | North              | 0.86   | 0.009       | 0.76 - 0.96 |
|                                         |                        | South              | 1.18   | 0.007       | 1.05 - 1.33 |
|                                         |                        | Gaza envelope      | 1.03   | 0.800       | 0.81 - 1.31 |
|                                         |                        | Center             | Ref    |             |             |

|                              |                        |                    |      |        |             |
|------------------------------|------------------------|--------------------|------|--------|-------------|
|                              | Socio-religious sector | Ultra-Orthodox Jew | 0.83 | 0.023  | 0.71 - 0.98 |
|                              |                        | Arab               | 0.59 | <0.001 | 0.45 - 0.79 |
|                              |                        | General Jewish     | Ref  |        |             |
| Interaction with October 7th | Biological sex         | Female             | 1.81 | <0.001 | 1.67 - 1.97 |
|                              |                        | Male               | Ref  |        |             |
|                              | District               | North              | 1.05 | 0.326  | 0.95 - 1.17 |
|                              |                        | South              | 0.94 | 0.353  | 0.84 - 1.07 |
|                              |                        | Gaza envelope      | 1.10 | 0.376  | 0.89 - 1.36 |
|                              |                        | Center             | Ref  |        |             |
|                              | Socio-religious sector | Ultra-Orthodox Jew | 0.62 | <0.001 | 0.52 - 0.72 |
|                              |                        | Arab               | 0.36 | <0.001 | 0.27 - 0.47 |
|                              |                        | General Jewish     | Ref  |        |             |

HR – hazard ratio; CI – confidence interval; SES – socioeconomic status; yr – years.

**Table S2.** Cox regression analysis with adjusted Hazard Ratios (HRs) for first purchase of anxiolytic medications (primary analysis) between 2006-2024 – **stratified by age group.**

| Variable                 | Category                    | Age 21 - 24     | Age 25 - 39     | Age 40 - 59     | Age 60+         |
|--------------------------|-----------------------------|-----------------|-----------------|-----------------|-----------------|
| Biological sex           | Female                      | 1.36(1.33-1.4)  | 1.28(1.27-1.3)  | 1.39(1.37-1.42) | 1.36(1.3-1.42)  |
|                          | Male                        | Ref             | Ref             | Ref             | Ref             |
| District                 | North                       | 1.13(1.09-1.17) | 1.01(1-1.03)    | 1.02(1-1.05)    | 1.01(0.94-1.08) |
|                          | South                       | 0.91(0.87-0.94) | 0.89(0.87-0.91) | 0.9(0.87-0.92)  | 0.86(0.77-0.97) |
|                          | Gaza envelope               | 0.71(0.66-0.77) | 0.82(0.78-0.85) | 0.81(0.76-0.86) | 0.79(0.59-1.07) |
|                          | Center                      | Ref             | Ref             | Ref             | Ref             |
| SES                      | Low                         | 0.99(0.95-1.03) | 0.96(0.94-0.98) | 0.95(0.92-0.98) | 1.01(0.91-1.11) |
|                          | Medium                      | Ref             | Ref             | Ref             | Ref             |
|                          | High                        | 1.09(1.06-1.13) | 1.01(0.99-1.02) | 1(0.98-1.02)    | 1.03(0.98-1.07) |
| Socio-religious sector   | Ultra-Orthodox Jew          | 0.82(0.78-0.86) | 0.92(0.9-0.95)  | 1.04(1-1.08)    | 1.02(0.92-1.13) |
|                          | Arab                        | 0.61(0.57-0.66) | 0.76(0.74-0.8)  | 0.76(0.72-0.8)  | 0.76(0.63-0.92) |
|                          | General Jewish              | Ref             | Ref             | Ref             | Ref             |
| Use of psychiatric drugs | Yes                         | 4.36(4.24-4.47) | 3.52(3.48-3.57) | 2.74(2.69-2.78) | 2.32(2.22-2.42) |
|                          | No                          | Ref             | Ref             | Ref             | Ref             |
| Armed conflict           | Second Lebanon War          | 1.03(0.75-1.42) | 1.54(1.34-1.77) | 1.4(1.13-1.74)  | 1.11(0.72-1.71) |
|                          | Military operation          | 1.32(1.19-1.47) | 1.28(1.21-1.36) | 1.27(1.18-1.37) | 1.44(1.21-1.71) |
|                          | October 7th                 | 3.32(2.99-3.68) | 4.55(4.3-4.81)  | 3.91(3.64-4.2)  | 2.67(2.1-3.4)   |
|                          | Relative National Stability | Ref             | Ref             | Ref             | Ref             |

**Table S3.** Cox regression analysis with adjusted Hazard Ratios (HRs) for first purchase of anxiolytic medications (primary analysis) between 2006-2024, ages 21-24.

|                                         | Variable                 | Category           | HR     | P-value     | 95%CI       |
|-----------------------------------------|--------------------------|--------------------|--------|-------------|-------------|
| Baseline                                | Biological sex           | Female             | 1.35   | <0.001      | 1.32 - 1.39 |
|                                         |                          | Male               | Ref    |             |             |
|                                         | District                 | North              | 1.13   | <0.001      | 1.09 - 1.17 |
|                                         |                          | South              | 0.90   | <0.001      | 0.87 - 0.94 |
|                                         |                          | Gaza envelope      | 0.71   | <0.001      | 0.66 - 0.77 |
|                                         |                          | Center             | Ref    |             |             |
|                                         | SES                      | Low                | 0.99   | 0.588       | 0.95 - 1.03 |
|                                         |                          | Medium             | Ref    |             |             |
|                                         |                          | High               | 1.09   | <0.001      | 1.06 - 1.13 |
|                                         | Socio-religious sector   | Ultra-Orthodox Jew | 0.83   | <0.001      | 0.78 - 0.87 |
|                                         |                          | Arab               | 0.62   | <0.001      | 0.58 - 0.67 |
|                                         |                          | General Jewish     | Ref    |             |             |
|                                         | Use of psychiatric drugs | Yes                | 4.35   | <0.001      | 4.24 - 4.47 |
|                                         |                          | No                 | Ref    |             |             |
| Armed conflict                          | Second Lebanon War       | 0.89               | 0.683  | 0.49 - 1.59 |             |
|                                         | Military operation       | 1.36               | 0.001  | 1.13 - 1.65 |             |
|                                         | October 7th              | 2.63               | <0.001 | 2.17 - 3.21 |             |
| Interaction with the Second Lebanon War | Biological sex           | Female             | 1.03   | 0.918       | 0.55 - 1.95 |
|                                         |                          | Male               | Ref    |             |             |
|                                         | District                 | North              | 1.54   | 0.247       | 0.74 - 3.21 |
|                                         |                          | South              | 0.90   | 0.844       | 0.31 - 2.57 |
|                                         |                          | Gaza envelope      | 0.00   | 0.942       | 0 - Inf     |
|                                         |                          | Center             | Ref    |             |             |
|                                         | Socio-religious sector   | Ultra-Orthodox Jew | 1.65   | 0.296       | 0.64 - 4.25 |
|                                         |                          | Arab               | 1.77   | 0.361       | 0.52 - 6.06 |
| General Jewish                          |                          | Ref                |        |             |             |
| Interaction with Military operation     | Biological sex           | Female             | 1.06   | 0.588       | 0.86 - 1.32 |
|                                         |                          | Male               | Ref    |             |             |
|                                         | District                 | North              | 0.78   | 0.118       | 0.58 - 1.06 |
|                                         |                          | South              | 1.05   | 0.784       | 0.76 - 1.44 |
|                                         |                          | Gaza envelope      | 0.87   | 0.672       | 0.46 - 1.65 |
|                                         |                          | Center             | Ref    |             |             |
|                                         | Socio-religious sector   | Ultra-Orthodox Jew | 0.86   | 0.426       | 0.59 - 1.25 |
|                                         |                          | Arab               | 0.68   | 0.218       | 0.37 - 1.26 |
| General Jewish                          |                          | Ref                |        |             |             |
| Interaction with October 7th            | Biological sex           | Female             | 1.54   | <0.001      | 1.24 - 1.9  |
|                                         |                          | Male               | Ref    |             |             |

|                        |                    |      |       |             |
|------------------------|--------------------|------|-------|-------------|
|                        | North              | 1.02 | 0.869 | 0.79 - 1.33 |
| District               | South              | 1.18 | 0.272 | 0.88 - 1.58 |
|                        | Gaza envelope      | 1.37 | 0.224 | 0.82 - 2.29 |
|                        | Center             | Ref  |       |             |
|                        | Ultra-Orthodox Jew | 0.57 | 0.007 | 0.38 - 0.86 |
| Socio-religious sector | Arab               | 0.32 | 0.003 | 0.15 - 0.68 |
|                        | General Jewish     | Ref  |       |             |

**Table S4.** Cox regression analysis with adjusted Hazard Ratios (HRs) for first purchase of anxiolytic medications (primary analysis) between 2006-2024, ages 25-39.

|                                         | Variable                 | Category           | HR     | P-value     | 95%CI       |
|-----------------------------------------|--------------------------|--------------------|--------|-------------|-------------|
| Baseline                                | Biological sex           | Female             | 1.27   | <0.001      | 1.25 - 1.28 |
|                                         |                          | Male               | Ref    |             |             |
|                                         | District                 | North              | 1.01   | 0.194       | 0.99 - 1.03 |
|                                         |                          | South              | 0.89   | <0.001      | 0.87 - 0.91 |
|                                         |                          | Gaza envelope      | 0.82   | <0.001      | 0.78 - 0.85 |
|                                         |                          | Center             | Ref    |             |             |
|                                         | SES                      | Low                | 0.96   | 0.001       | 0.94 - 0.99 |
|                                         |                          | Medium             | Ref    |             |             |
|                                         |                          | High               | 1.01   | 0.53        | 0.99 - 1.02 |
|                                         | Socio-religious sector   | Ultra-Orthodox Jew | 0.93   | <0.001      | 0.9 - 0.96  |
|                                         |                          | Arab               | 0.78   | <0.001      | 0.75 - 0.81 |
|                                         |                          | General Jewish     | Ref    |             |             |
|                                         | Use of psychiatric drugs | Yes                | 3.53   | <0.001      | 3.48 - 3.57 |
| No                                      |                          | Ref                |        |             |             |
| Armed conflict                          | Second Lebanon War       | 1.3                | 0.017  | 1.05 - 1.62 |             |
|                                         | Military operation       | 1.15               | 0.008  | 1.04 - 1.28 |             |
|                                         | October 7th              | 3.22               | <0.001 | 2.89 - 3.58 |             |
|                                         |                          |                    |        |             |             |
| Interaction with the Second Lebanon War | Biological sex           | Female             | 1.17   | 0.174       | 0.94 - 1.45 |
|                                         |                          | Male               | Ref    |             |             |
|                                         | District                 | North              | 1.53   | 0.001       | 1.18 - 1.98 |
|                                         |                          | South              | 0.85   | 0.402       | 0.59 - 1.24 |
|                                         |                          | Gaza envelope      | 0.97   | 0.932       | 0.5 - 1.89  |
|                                         |                          | Center             | Ref    |             |             |
|                                         | Socio-religious sector   | Ultra-Orthodox Jew | 1.1    | 0.642       | 0.73 - 1.68 |
| Arab                                    |                          | 0.83               | 0.533  | 0.46 - 1.5  |             |
| General Jewish                          |                          | Ref                |        |             |             |
| Interaction with Military operation     | Biological sex           | Female             | 1.26   | <0.001      | 1.13 - 1.42 |
|                                         |                          | Male               | Ref    |             |             |
|                                         | District                 | North              | 0.85   | 0.055       | 0.72 - 1    |
|                                         |                          | South              | 1.15   | 0.092       | 0.98 - 1.36 |
|                                         |                          | Gaza envelope      | 1.13   | 0.416       | 0.84 - 1.52 |
|                                         |                          | Center             | Ref    |             |             |
|                                         |                          |                    |        |             |             |
|                                         | Socio-religious sector   | Ultra-Orthodox Jew | 0.77   | 0.024       | 0.61 - 0.97 |
|                                         |                          | Arab               | 0.5    | 0.001       | 0.33 - 0.75 |
|                                         |                          | General Jewish     | Ref    |             |             |

|                                 |                        |                    |      |        |             |
|---------------------------------|------------------------|--------------------|------|--------|-------------|
| Interaction with<br>October 7th | Biological sex         | Female             | 1.87 | <0.001 | 1.67 - 2.1  |
|                                 |                        | Male               | Ref  |        |             |
|                                 | District               | North              | 1.12 | 0.134  | 0.97 - 1.29 |
|                                 |                        | South              | 0.86 | 0.091  | 0.72 - 1.03 |
|                                 |                        | Gaza envelope      | 1.02 | 0.905  | 0.76 - 1.36 |
|                                 |                        | Center             | Ref  |        |             |
|                                 | Socio-religious sector | Ultra-Orthodox Jew | 0.71 | 0.001  | 0.57 - 0.87 |
|                                 |                        | Arab               | 0.34 | <0.001 | 0.24 - 0.5  |
|                                 |                        | General Jewish     | Ref  |        |             |



**Table S5.** Cox regression analysis with adjusted Hazard Ratios (HRs) for first purchase of anxiolytic medications (primary analysis) between 2006-2024, ages 40-59.

|                                         | Variable                 | Category           | HR     | P-value     | 95%CI       |
|-----------------------------------------|--------------------------|--------------------|--------|-------------|-------------|
| Baseline                                | Biological sex           | Female             | 1.37   | <0.001      | 1.35 - 1.4  |
|                                         |                          | Male               | Ref    |             |             |
|                                         | District                 | North              | 1.03   | 0.042       | 1 - 1.05    |
|                                         |                          | South              | 0.89   | <0.001      | 0.87 - 0.92 |
|                                         |                          | Gaza envelope      | 0.81   | <0.001      | 0.77 - 0.86 |
|                                         |                          | Center             | Ref    |             |             |
|                                         | SES                      | Low                | 0.95   | 0.001       | 0.92 - 0.98 |
|                                         |                          | Medium             | Ref    |             |             |
|                                         |                          | High               | 1      | 0.958       | 0.98 - 1.02 |
|                                         | Socio-religious sector   | Ultra-Orthodox Jew | 1.05   | 0.017       | 1.01 - 1.09 |
|                                         |                          | Arab               | 0.77   | <0.001      | 0.73 - 0.82 |
|                                         |                          | General Jewish     | Ref    |             |             |
|                                         | Use of psychiatric drugs | Yes                | 2.74   | <0.001      | 2.69 - 2.78 |
|                                         |                          | No                 | Ref    |             |             |
| Armed conflict                          | Second Lebanon War       | 1.36               | 0.104  | 0.94 - 1.96 |             |
|                                         | Military operation       | 1.06               | 0.447  | 0.92 - 1.21 |             |
|                                         | October 7th              | 2.74               | <0.001 | 2.38 - 3.16 |             |
| Interaction with the Second Lebanon War | Biological sex           | Female             | 1.12   | 0.58        | 0.75 - 1.67 |
|                                         |                          | Male               | Ref    |             |             |
|                                         | District                 | North              | 1.21   | 0.468       | 0.72 - 2.03 |
|                                         |                          | South              | 0.86   | 0.745       | 0.35 - 2.12 |
|                                         |                          | Gaza envelope      | -      | -           | -           |
|                                         |                          | Center             | Ref    |             |             |
|                                         | Socio-religious sector   | Ultra-Orthodox Jew | 0.3    | 0.042       | 0.1 - 0.96  |
| Arab                                    |                          | 1.08               | 0.901  | 0.33 - 3.57 |             |
| General Jewish                          |                          | Ref                |        |             |             |
| Interaction with Military operation     | Biological sex           | Female             | 1.33   | <0.001      | 1.14 - 1.55 |
|                                         |                          | Male               | Ref    |             |             |
|                                         | District                 | North              | 0.91   | 0.384       | 0.74 - 1.12 |
|                                         |                          | South              | 1.32   | 0.013       | 1.06 - 1.63 |
|                                         |                          | Gaza envelope      | 0.86   | 0.58        | 0.52 - 1.45 |
|                                         |                          | Center             | Ref    |             |             |
|                                         | Socio-religious sector   | Ultra-Orthodox Jew | 0.78   | 0.116       | 0.57 - 1.06 |
| Arab                                    |                          | 0.79               | 0.35   | 0.47 - 1.3  |             |
| General Jewish                          |                          | Ref                |        |             |             |
| Interaction with October 7th            | Biological sex           | Female             | 1.83   | <0.001      | 1.57 - 2.13 |
|                                         |                          | Male               | Ref    |             |             |

|                        |                    |      |       |             |
|------------------------|--------------------|------|-------|-------------|
|                        | North              | 0.95 | 0.592 | 0.79 - 1.14 |
| District               | South              | 0.89 | 0.3   | 0.72 - 1.11 |
|                        | Gaza envelope      | 1.06 | 0.774 | 0.72 - 1.56 |
|                        | Center             | Ref  |       |             |
|                        | Ultra-Orthodox Jew | 0.54 | 0.001 | 0.39 - 0.77 |
| Socio-religious sector | Arab               | 0.35 | 0.001 | 0.19 - 0.64 |
|                        | General Jewish     | Ref  |       |             |

**Table S6.** Cox regression analysis with adjusted Hazard Ratios (HRs) for first purchase of anxiolytic medications (primary analysis) between 2006-2024, ages 60 or older.

|                                         | Variable                 | Category           | HR    | P-value     | 95%CI        |
|-----------------------------------------|--------------------------|--------------------|-------|-------------|--------------|
| Baseline                                | Biological sex           | Female             | 1.34  | <0.001      | 1.29 - 1.4   |
|                                         |                          | Male               | Ref   |             |              |
|                                         | District                 | North              | 1.02  | 0.598       | 0.95 - 1.09  |
|                                         |                          | South              | 0.85  | 0.01        | 0.76 - 0.96  |
|                                         |                          | Gaza envelope      | 0.8   | 0.144       | 0.59 - 1.08  |
|                                         |                          | Center             | Ref   |             |              |
|                                         | SES                      | Low                | 1.01  | 0.871       | 0.91 - 1.11  |
|                                         |                          | Medium             | Ref   |             |              |
|                                         |                          | High               | 1.03  | 0.226       | 0.98 - 1.07  |
|                                         | Socio-religious sector   | Ultra-Orthodox Jew | 1.02  | 0.68        | 0.92 - 1.13  |
|                                         |                          | Arab               | 0.75  | 0.003       | 0.62 - 0.91  |
|                                         |                          | General Jewish     | Ref   |             |              |
|                                         | Use of psychiatric drugs | Yes                | 2.32  | <0.001      | 2.22 - 2.42  |
|                                         |                          | No                 | Ref   |             |              |
| Armed conflict                          | Second Lebanon War       | 0.88               | 0.739 | 0.41 - 1.87 |              |
|                                         | Military operation       | 1.06               | 0.733 | 0.76 - 1.48 |              |
|                                         | October 7th              | 1.64               | 0.044 | 1.01 - 2.66 |              |
| Interaction with the Second Lebanon War | Biological sex           | Female             | 1.37  | 0.446       | 0.61 - 3.11  |
|                                         |                          | Male               | Ref   |             |              |
|                                         | District                 | North              | 0.33  | 0.231       | 0.06 - 2.01  |
|                                         |                          | South              | 1.65  | 0.623       | 0.22 - 12.25 |
|                                         |                          | Gaza envelope      | -     | -           | -            |
|                                         |                          | Center             | Ref   |             |              |
|                                         | Socio-religious sector   | Ultra-Orthodox Jew | 0.92  | 0.907       | 0.22 - 3.88  |
|                                         |                          | Arab               | 16.34 | 0.002       | 2.68 - 99.56 |
|                                         |                          | General Jewish     | Ref   |             |              |
| Interaction with Military operation     | Biological sex           | Female             | 1.53  | 0.022       | 1.06 - 2.2   |
|                                         |                          | Male               | Ref   |             |              |
|                                         | District                 | North              | 0.77  | 0.405       | 0.41 - 1.43  |
|                                         |                          | South              | 1.14  | 0.77        | 0.47 - 2.82  |
|                                         |                          | Gaza envelope      | 1.56  | 0.662       | 0.21 - 11.42 |
|                                         |                          | Center             | Ref   |             |              |
|                                         | Socio-religious sector   | Ultra-Orthodox Jew | 1.45  | 0.136       | 0.89 - 2.36  |
|                                         |                          | Arab               | 0     | 0.948       | 0 - Inf      |
|                                         |                          | General Jewish     | Ref   |             |              |
|                                         | Biological sex           | Female             | 2.05  | 0.006       | 1.23 - 3.42  |

| Interaction with<br>October 7th |                    | Male | Ref   |             |  |
|---------------------------------|--------------------|------|-------|-------------|--|
| District                        | North              | 0.85 | 0.668 | 0.41 - 1.77 |  |
|                                 | South              | 1.76 | 0.19  | 0.76 - 4.08 |  |
|                                 | Gaza envelope      | -    | -     | -           |  |
|                                 | Center             | Ref  |       |             |  |
| Socio-religious sector          | Ultra-Orthodox Jew | 0.4  | 0.117 | 0.13 - 1.26 |  |
|                                 | Arab               | 2.01 | 0.283 | 0.56 - 7.22 |  |
|                                 | General Jewish     | Ref  |       |             |  |

**Table S7.** Cox regression analysis with adjusted Hazard Ratios (HRs) for first purchase of anxiolytic medications (primary analysis) between 2006-2024 – **stratified by socio-religious sector.**

| Variable                 | Category                    | General Jewish  | Ultra-Orthodox Jewish | Arab            |
|--------------------------|-----------------------------|-----------------|-----------------------|-----------------|
| Age group, yr.           | 25-39                       | 1.22(1.19-1.25) | 1.51(1.38-1.65)       | 1.47(1.3-1.67)  |
|                          | 40-59                       | 1.62(1.57-1.67) | 2.28(2.06-2.51)       | 1.78(1.54-2.05) |
|                          | 60+                         | 1.94(1.87-2.01) | 2.84(2.53-3.18)       | 1.94(1.56-2.4)  |
|                          | 21-24                       | Ref             | Ref                   | Ref             |
| Biological sex           | Female                      | 1.35(1.34-1.37) | 1.22(1.17-1.26)       | 1.19(1.13-1.25) |
|                          | Male                        | Ref             | Ref                   | Ref             |
| District                 | North                       | 1.01(0.99-1.02) | 1.09(1.02-1.16)       | 1.41(1.33-1.5)  |
|                          | South                       | 0.79(0.77-0.82) | 0.76(0.67-0.86)       | 2.02(0.65-6.29) |
|                          | Gaza envelope               | 0.86(0.85-0.88) | 1.15(1.1-1.21)        | 0.84(0.73-0.97) |
|                          | Center                      | Ref             | Ref                   | Ref             |
| SES                      | Low                         | 0.97(0.96-0.99) | 1.01(0.97-1.05)       | 0.89(0.83-0.96) |
|                          | Medium                      | Ref             | Ref                   | Ref             |
|                          | High                        | 1.01(1-1.02)    | 1.07(0.93-1.25)       | 1.27(1.11-1.46) |
| Use of psychiatric drugs | Yes                         | 3.21(3.17-3.24) | 3.96(3.82-4.1)        | 4.12(3.91-4.34) |
|                          | No                          | Ref             | Ref                   | Ref             |
| Armed conflict           | Second Lebanon War          | 1.45(1.27-1.65) | 1.19(0.77-1.83)       | 1.66(0.9-3.08)  |
|                          | Military operation          | 1.31(1.24-1.39) | 1.13(0.93-1.36)       | 0.72(0.52-0.98) |
|                          | October 7th                 | 4.46(4.23-4.7)  | 2.89(2.39-3.49)       | 1.61(1.15-2.27) |
|                          | Relative National Stability | Ref             | Ref                   | Ref             |

**Table S8.** Cox regression analysis with adjusted Hazard Ratios (HRs) for first purchase of anxiolytic medications (primary analysis) between 2006-2024, general Jewish population.

|                                         | Variable                 | Category      | HR     | P-value     | 95%CI       |
|-----------------------------------------|--------------------------|---------------|--------|-------------|-------------|
| Baseline                                | Age group, yr.           | 25-39         | 1.22   | <0.001      | 1.19 - 1.25 |
|                                         |                          | 40-59         | 1.62   | <0.001      | 1.57 - 1.67 |
|                                         |                          | 60+           | 1.94   | <0.001      | 1.87 - 2.01 |
|                                         |                          | 21-24         | Ref    |             |             |
|                                         | Biological sex           | Female        | 1.34   | <0.001      | 1.32 - 1.35 |
|                                         |                          | Male          | Ref    |             |             |
|                                         | District                 | North         | 1.01   | 0.404       | 0.99 - 1.02 |
|                                         |                          | South         | 0.86   | <0.001      | 0.85 - 0.88 |
|                                         |                          | Gaza envelope | 0.79   | <0.001      | 0.77 - 0.81 |
|                                         |                          | Center        | Ref    |             |             |
|                                         | SES                      | Low           | 0.97   | 0.006       | 0.96 - 0.99 |
|                                         |                          | Medium        | Ref    |             |             |
|                                         |                          | High          | 1.01   | 0.045       | 1 - 1.02    |
|                                         | Use of psychiatric drugs | Yes           | 3.21   | <0.001      | 3.18 - 3.24 |
|                                         |                          | No            | Ref    |             |             |
| Armed conflict                          | Second Lebanon War       | 1.29          | 0.008  | 1.07 - 1.57 |             |
|                                         | Military operation       | 1.13          | 0.004  | 1.04 - 1.23 |             |
|                                         | October 7th              | 2.98          | <0.001 | 2.74 - 3.24 |             |
| Interaction with the Second Lebanon War | Biological sex           | Female        | 1.12   | 0.23        | 0.93 - 1.36 |
|                                         |                          | Male          | Ref    |             |             |
|                                         | District                 | North         | 1.35   | 0.01        | 1.07 - 1.7  |
|                                         |                          | South         | 0.88   | 0.444       | 0.62 - 1.23 |
|                                         |                          | Gaza envelope | 0.79   | 0.493       | 0.41 - 1.54 |
|                                         | Center                   | Ref           |        |             |             |
| Interaction with Military operation     | Biological sex           | Female        | 1.26   | <0.001      | 1.15 - 1.37 |
|                                         |                          | Male          | Ref    |             |             |
|                                         | District                 | North         | 0.87   | 0.023       | 0.77 - 0.98 |
|                                         |                          | South         | 1.18   | 0.012       | 1.04 - 1.34 |
|                                         |                          | Gaza envelope | 1.04   | 0.74        | 0.82 - 1.33 |
|                                         | Center                   | Ref           |        |             |             |
| Interaction with October 7th            | Biological sex           | Female        | 1.82   | <0.001      | 1.67 - 1.99 |
|                                         |                          | Male          | Ref    |             |             |
|                                         | District                 | North         | 1.08   | 0.168       | 0.97 - 1.2  |
|                                         |                          | South         | 0.95   | 0.445       | 0.84 - 1.08 |
|                                         |                          | Gaza envelope | 1.12   | 0.287       | 0.91 - 1.39 |
|                                         | Center                   | Ref           |        |             |             |

**Table S9.** Cox regression analysis with adjusted Hazard Ratios (HRs) for first purchase of anxiolytic medications (primary analysis) between 2006-2024, Ultra-Orthodox Jewish population.

|                                         | Variable                 | Category      | HR     | P-value     | 95%CI       |
|-----------------------------------------|--------------------------|---------------|--------|-------------|-------------|
| Baseline                                | Age group, yr.           | 25-39         | 1.51   | <0.001      | 1.38 - 1.65 |
|                                         |                          | 40-59         | 2.28   | <0.001      | 2.07 - 2.51 |
|                                         |                          | 60+           | 2.84   | <0.001      | 2.53 - 3.18 |
|                                         |                          | 21-24         | Ref    |             |             |
|                                         | Biological sex           | Female        | 1.2    | <0.001      | 1.16 - 1.25 |
|                                         |                          | Male          | Ref    |             |             |
|                                         | District                 | North         | 1.09   | 0.011       | 1.02 - 1.17 |
|                                         |                          | South         | 1.15   | <0.001      | 1.1 - 1.21  |
|                                         |                          | Gaza envelope | 0.77   | <0.001      | 0.68 - 0.87 |
|                                         |                          | Center        | Ref    |             |             |
|                                         | SES                      | Low           | 1.01   | 0.586       | 0.97 - 1.05 |
|                                         |                          | Medium        | Ref    |             |             |
|                                         |                          | High          | 1.08   | 0.334       | 0.93 - 1.25 |
|                                         | Use of psychiatric drugs | Yes           | 3.96   | <0.001      | 3.82 - 4.1  |
| No                                      |                          | Ref           |        |             |             |
| Armed conflict                          | Second Lebanon War       | 1.08          | 0.807  | 0.57 - 2.04 |             |
|                                         | Military operation       | 0.96          | 0.773  | 0.73 - 1.27 |             |
|                                         | October 7th              | 2.06          | <0.001 | 1.52 - 2.79 |             |
| Interaction with the Second Lebanon War | Biological sex           | Female        | 1.25   | 0.534       | 0.62 - 2.49 |
|                                         |                          | Male          | Ref    |             |             |
|                                         | District                 | North         | 1.39   | 0.545       | 0.48 - 3.98 |
|                                         |                          | South         | 0.69   | 0.489       | 0.24 - 1.98 |
|                                         |                          | Gaza envelope | 0      | 0.956       | 0 - Inf     |
| Center                                  | Ref                      |               |        |             |             |
| Interaction with Military operation     | Biological sex           | Female        | 1.27   | 0.135       | 0.93 - 1.73 |
|                                         |                          | Male          | Ref    |             |             |
|                                         | District                 | North         | 0.73   | 0.373       | 0.37 - 1.45 |
|                                         |                          | South         | 1.3    | 0.171       | 0.89 - 1.89 |
|                                         |                          | Gaza envelope | 0.89   | 0.843       | 0.28 - 2.82 |
| Center                                  | Ref                      |               |        |             |             |
| Interaction with October 7th            | Biological sex           | Female        | 1.86   | <0.001      | 1.33 - 2.6  |
|                                         |                          | Male          | Ref    |             |             |
|                                         | District                 | North         | 0.97   | 0.910       | 0.52 - 1.8  |
|                                         |                          | South         | 0.9    | 0.628       | 0.58 - 1.39 |
|                                         |                          | Gaza envelope | 0.64   | 0.528       | 0.16 - 2.59 |
| Center                                  | Ref                      |               |        |             |             |

**Table S10.** Cox regression analysis with adjusted Hazard Ratios (HRs) for first purchase of anxiolytic medications (primary analysis) between 2006-2024, Arab population.

|                                         | Variable                 | Category      | HR    | P-value     | 95%CI        |
|-----------------------------------------|--------------------------|---------------|-------|-------------|--------------|
| Baseline                                | Age group, yr.           | 25-39         | 1.47  | <0.001      | 1.3 - 1.67   |
|                                         |                          | 40-59         | 1.78  | <0.001      | 1.54 - 2.05  |
|                                         |                          | 60+           | 1.94  | <0.001      | 1.56 - 2.4   |
|                                         |                          | 21-24         | Ref   |             |              |
|                                         | Biological sex           | Female        | 1.19  | <0.001      | 1.13 - 1.25  |
|                                         |                          | Male          | Ref   |             |              |
|                                         | District                 | North         | 1.41  | <0.001      | 1.33 - 1.5   |
|                                         |                          | South         | 0.84  | 0.014       | 0.73 - 0.97  |
|                                         |                          | Gaza envelope | -     | -           | -            |
|                                         |                          | Center        | Ref   |             |              |
|                                         | SES                      | Low           | 0.89  | 0.001       | 0.83 - 0.96  |
|                                         |                          | Medium        | Ref   |             |              |
|                                         |                          | High          | 1.28  | <0.001      | 1.11 - 1.46  |
|                                         | Use of psychiatric drugs | Yes           | 4.12  | <0.001      | 3.91 - 4.34  |
| No                                      |                          | Ref           |       |             |              |
| Armed conflict                          | Second Lebanon War       | 0.46          | 0.338 | 0.09 - 2.27 |              |
|                                         | Military operation       | 0.68          | 0.214 | 0.37 - 1.25 |              |
|                                         | October 7th              | 1.71          | 0.076 | 0.95 - 3.08 |              |
| Interaction with the Second Lebanon War | Biological sex           | Female        | 1.51  | 0.4         | 0.58 - 3.93  |
|                                         |                          | Male          | Ref   |             |              |
|                                         | District                 | North         | 3.7   | 0.08        | 0.86 - 15.96 |
|                                         |                          | South         | 0     | 0.976       | 0 - Inf      |
| Interaction with Military operation     | Biological sex           | Female        | 1.31  | 0.361       | 0.74 - 2.32  |
|                                         |                          | Male          | Ref   |             |              |
|                                         | District                 | North         | 0.84  | 0.566       | 0.47 - 1.51  |
|                                         |                          | South         | 0.95  | 0.946       | 0.22 - 4.13  |
| Interaction with October 7th            | Biological sex           | Female        | 1.031 | 0.916       | 0.59 - 1.81  |
|                                         |                          | Male          | Ref   |             |              |
|                                         | District                 | North         | 0.84  | 0.566       | 0.47 - 1.52  |
|                                         |                          | South         | 1.98  | 0.275       | 0.58 - 6.8   |
|                                         | Gaza envelope            | -             | -     | -           |              |
|                                         | Center                   | Ref           |       |             |              |



**Table S11.** Cox regression analysis with adjusted Hazard Ratios (HRs) for renewed purchase of anxiolytic medications (secondary analysis) between 2006-2024.

|                                         | <b>Variable</b>        | <b>Category</b>    | <b>HR</b> | <b>P-value</b> | <b>95%CI</b> |
|-----------------------------------------|------------------------|--------------------|-----------|----------------|--------------|
| Baseline                                | Age group, yr.         | 25-39              | 1.04      | 0.003          | 1.02 - 1.07  |
|                                         |                        | 40-59              | 1.18      | <0.001         | 1.15 - 1.21  |
|                                         |                        | 60+                | 1.29      | <0.001         | 1.25 - 1.33  |
|                                         |                        | 21-24              | Ref       |                |              |
|                                         | Biological sex         | Female             | 1.20      | <0.001         | 1.18 - 1.21  |
|                                         |                        | Male               | Ref       |                |              |
|                                         | District               | North              | 1.03      | 0.004          | 1.01 - 1.05  |
|                                         |                        | South              | 0.92      | <0.001         | 0.9 - 0.95   |
|                                         |                        | Gaza envelope      | 0.85      | <0.001         | 0.81 - 0.89  |
|                                         |                        | Center             | Ref       |                |              |
|                                         | SES                    | Low                | 0.99      | 0.251          | 0.97 - 1.01  |
|                                         |                        | Medium             | Ref       |                |              |
|                                         |                        | High               | 1.04      | <0.001         | 1.03 - 1.06  |
|                                         | Socio-religious sector | Ultra-Orthodox Jew | 1.08      | <0.001         | 1.05 - 1.11  |
|                                         |                        | Arab               | 0.83      | <0.001         | 0.79 - 0.86  |
| General Jewish                          |                        | Ref                |           |                |              |
| Use of psychiatric drugs                | Yes                    | 1.97               | <0.001    | 1.94 - 2.00    |              |
|                                         | No                     | Ref                |           |                |              |
| Armed conflict                          | Second Lebanon War     | 1.23               | 0.054     | 1.0 - 1.52     |              |
|                                         | Military operation     | 1.11               | 0.053     | 1.0 - 1.23     |              |
|                                         | October 7th            | 2.42               | <0.001    | 2.16 - 2.73    |              |
| Interaction with the Second Lebanon War | Biological sex         | Female             | 1.21      | 0.100          | 0.97 - 1.51  |
|                                         |                        | Male               | Ref       |                |              |
|                                         | District               | North              | 1.28      | 0.079          | 0.97 - 1.69  |
|                                         |                        | South              | 0.74      | 0.187          | 0.48 - 1.16  |
|                                         |                        | Gaza envelope      | 0.73      | 0.483          | 0.3 - 1.77   |
|                                         |                        | Center             | Ref       |                |              |
| Socio-religious sector                  | Ultra-Orthodox Jew     | 1.09               | 0.638     | 0.75 - 1.59    |              |
|                                         | Arab                   | 0.64               | 0.257     | 0.30 - 1.38    |              |
|                                         | General Jewish         | Ref                |           |                |              |
| Interaction with Military operation     | Biological sex         | Female             | 1.18      | 0.004          | 1.05 - 1.32  |
|                                         |                        | Male               | Ref       |                |              |
|                                         | District               | North              | 1.07      | 0.393          | 0.92 - 1.24  |
|                                         |                        | South              | 1.17      | 0.082          | 0.98 - 1.39  |
|                                         |                        | Gaza envelope      | 1.04      | 0.837          | 0.73 - 1.49  |
|                                         |                        | Center             | Ref       |                |              |

|                                 |                        |                    |      |        |             |
|---------------------------------|------------------------|--------------------|------|--------|-------------|
|                                 |                        | Ultra-Orthodox Jew | 0.93 | 0.488  | 0.76 - 1.14 |
|                                 | Socio-religious sector | Arab               | 0.66 | 0.040  | 0.45 - 0.98 |
|                                 |                        | General Jewish     | Ref  |        |             |
| Interaction with<br>October 7th | Biological sex         | Female             | 1.89 | <0.001 | 1.67 - 2.13 |
|                                 |                        | Male               | Ref  |        |             |
|                                 | District               | North              | 1.15 | 0.062  | 0.99 - 1.32 |
|                                 |                        | South              | 1.06 | 0.483  | 0.9 - 1.26  |
|                                 |                        | Gaza envelope      | 1.44 | 0.015  | 1.08 - 1.94 |
|                                 |                        | Center             | Ref  |        |             |
|                                 | Socio-religious sector | Ultra-Orthodox Jew | 0.61 | <0.001 | 0.48 - 0.77 |
|                                 |                        | Arab               | 0.34 | <0.001 | 0.21 - 0.55 |
|                                 |                        | General Jewish     | Ref  |        |             |

**Table S12.** Cox regression analysis with adjusted Hazard Ratios (HRs) for renewed purchases of anxiolytic medications (secondary analysis) between 2006-2024, ages 21-24.

|                                         | Variable                 | Category           | HR    | P-value     | 95%CI       |
|-----------------------------------------|--------------------------|--------------------|-------|-------------|-------------|
| Baseline                                | Biological sex           | Female             | 1.22  | <0.001      | 1.16 - 1.29 |
|                                         |                          | Male               | Ref   |             |             |
|                                         | District                 | North              | 1.05  | 0.148       | 0.98 - 1.13 |
|                                         |                          | South              | 1.01  | 0.772       | 0.93 - 1.1  |
|                                         |                          | Gaza envelope      | 0.76  | 0.001       | 0.64 - 0.89 |
|                                         |                          | Center             | Ref   |             |             |
|                                         | SES                      | Low                | 0.95  | 0.19        | 0.87 - 1.03 |
|                                         |                          | Medium             | Ref   |             |             |
|                                         |                          | High               | 1.05  | 0.143       | 0.99 - 1.11 |
|                                         | Socio-religious sector   | Ultra-Orthodox Jew | 0.98  | 0.712       | 0.89 - 1.08 |
|                                         |                          | Arab               | 0.74  | <0.001      | 0.63 - 0.86 |
|                                         |                          | General Jewish     | Ref   |             |             |
|                                         | Use of psychiatric drugs | Yes                | 2.61  | <0.001      | 2.43 - 2.8  |
|                                         |                          | No                 | Ref   |             |             |
| Armed conflict                          | Second Lebanon War       | 1.02               | 0.974 | 0.29 - 3.64 |             |
|                                         | Military operation       | 0.81               | 0.374 | 0.5 - 1.3   |             |
|                                         | October 7th              | 2.00               | 0.002 | 1.3 - 3.08  |             |
| Interaction with the Second Lebanon War | Biological sex           | Female             | 0.98  | 0.982       | 0.23 - 4.16 |
|                                         |                          | Male               | Ref   |             |             |
|                                         | District                 | North              | 0.69  | 0.729       | 0.08 - 5.74 |
|                                         |                          | South              | 0.88  | 0.908       | 0.11 - 7.37 |
|                                         |                          | Gaza envelope      | -     | -           | -           |
|                                         |                          | Center             | Ref   |             |             |
|                                         | Socio-religious sector   | Ultra-Orthodox Jew | 1.11  | 0.92        | 0.13 - 9.27 |
|                                         |                          | Arab               | -     | -           | -           |
| General Jewish                          |                          | Ref                |       |             |             |
| Interaction with Military operation     | Biological sex           | Female             | 1.41  | 0.199       | 0.84 - 2.37 |
|                                         |                          | Male               | Ref   |             |             |
|                                         | District                 | North              | 0.96  | 0.913       | 0.49 - 1.9  |
|                                         |                          | South              | 1.21  | 0.581       | 0.61 - 2.42 |
|                                         |                          | Gaza envelope      | -     | -           | -           |
|                                         |                          | Center             | Ref   |             |             |
|                                         | Socio-religious sector   | Ultra-Orthodox Jew | 1.15  | 0.723       | 0.54 - 2.42 |
|                                         |                          | Arab               | 0.92  | 0.913       | 0.22 - 3.96 |
| General Jewish                          |                          | Ref                |       |             |             |
| Interaction with October 7th            | Biological sex           | Female             | 1.34  | 0.227       | 0.84 - 2.14 |
|                                         |                          | Male               | Ref   |             |             |

|                        |                    |      |       |             |
|------------------------|--------------------|------|-------|-------------|
|                        | North              | 1.01 | 0.969 | 0.56 - 1.81 |
| District               | South              | 0.81 | 0.581 | 0.38 - 1.71 |
|                        | Gaza envelope      | 2.39 | 0.097 | 0.85 - 6.7  |
|                        | Center             | Ref  |       |             |
|                        | Ultra-Orthodox Jew | 0.62 | 0.3   | 0.25 - 1.54 |
| Socio-religious sector | Arab               | 0.65 | 0.55  | 0.15 - 2.7  |
|                        | General Jewish     | Ref  |       |             |

**Table S13.** Cox regression analysis with adjusted Hazard Ratios (HRs) for renewed purchases of anxiolytic medications (secondary analysis) between 2006-2024, ages 25-39.

|                                         | Variable                 | Category           | HR     | P-value     | 95%CI       |
|-----------------------------------------|--------------------------|--------------------|--------|-------------|-------------|
| Baseline                                | Biological sex           | Female             | 1.13   | <0.001      | 1.11 - 1.15 |
|                                         |                          | Male               | Ref    |             |             |
|                                         | District                 | North              | 1.03   | 0.088       | 1 - 1.06    |
|                                         |                          | South              | 0.91   | <0.001      | 0.88 - 0.95 |
|                                         |                          | Gaza envelope      | 0.86   | <0.001      | 0.8 - 0.91  |
|                                         |                          | Center             | Ref    |             |             |
|                                         | SES                      | Low                | 0.98   | 0.243       | 0.95 - 1.01 |
|                                         |                          | Medium             | Ref    |             |             |
|                                         |                          | High               | 1.06   | <0.001      | 1.03 - 1.08 |
|                                         | Socio-religious sector   | Ultra-Orthodox Jew | 1.06   | 0.012       | 1.01 - 1.1  |
|                                         |                          | Arab               | 0.88   | <0.001      | 0.83 - 0.93 |
|                                         |                          | General Jewish     | Ref    |             |             |
|                                         | Use of psychiatric drugs | Yes                | 2.22   | <0.001      | 2.16 - 2.27 |
|                                         |                          | No                 | Ref    |             |             |
| Armed conflict                          | Second Lebanon War       | 1.08               | 0.629  | 0.79 - 1.48 |             |
|                                         | Military operation       | 1.1                | 0.253  | 0.94 - 1.28 |             |
|                                         | October 7th              | 2.39               | <0.001 | 2 - 2.87    |             |
| Interaction with the Second Lebanon War | Biological sex           | Female             | 1.2    | 0.3         | 0.85 - 1.68 |
|                                         |                          | Male               | Ref    |             |             |
|                                         | District                 | North              | 1.74   | 0.004       | 1.19 - 2.54 |
|                                         |                          | South              | 0.59   | 0.134       | 0.3 - 1.17  |
|                                         |                          | Gaza envelope      | 0.99   | 0.987       | 0.36 - 2.7  |
|                                         |                          | Center             | Ref    |             |             |
|                                         | Socio-religious sector   | Ultra-Orthodox Jew | 1.03   | 0.938       | 0.54 - 1.95 |
|                                         |                          | Arab               | 0.69   | 0.42        | 0.28 - 1.71 |
| General Jewish                          |                          | Ref                |        |             |             |
| Interaction with Military operation     | Biological sex           | Female             | 1.2    | 0.047       | 1 - 1.43    |
|                                         |                          | Male               | Ref    |             |             |
|                                         | District                 | North              | 0.98   | 0.85        | 0.77 - 1.24 |
|                                         |                          | South              | 1.16   | 0.257       | 0.9 - 1.5   |
|                                         |                          | Gaza envelope      | 0.85   | 0.548       | 0.5 - 1.45  |
|                                         |                          | Center             | Ref    |             |             |
|                                         | Socio-religious sector   | Ultra-Orthodox Jew | 1.09   | 0.559       | 0.81 - 1.48 |
|                                         |                          | Arab               | 0.66   | 0.147       | 0.37 - 1.16 |
| General Jewish                          |                          | Ref                |        |             |             |
|                                         | Biological sex           | Female             | 2.1    | <0.001      | 1.74 - 2.54 |

| Interaction with |                        | Male               | Ref  |       |             |
|------------------|------------------------|--------------------|------|-------|-------------|
| October 7th      | District               | North              | 1.28 | 0.026 | 1.03 - 1.58 |
|                  |                        | South              | 0.97 | 0.837 | 0.74 - 1.28 |
|                  |                        | Gaza envelope      | 1.27 | 0.309 | 0.8 - 2.02  |
|                  |                        | Center             | Ref  |       |             |
|                  | Socio-religious sector | Ultra-Orthodox Jew | 0.71 | 0.049 | 0.5 - 1.0   |
|                  |                        | Arab               | 0.30 | 0.001 | 0.15 - 0.61 |
|                  |                        | General Jewish     | Ref  |       |             |

**Table S14.** Cox regression analysis with adjusted Hazard Ratios (HRs) for renewed purchases of anxiolytic medications (secondary analysis) between 2006-2024, ages 40-59.

|                                         | Variable                 | Category           | HR     | P-value     | 95%CI       |
|-----------------------------------------|--------------------------|--------------------|--------|-------------|-------------|
| Baseline                                | Biological sex           | Female             | 1.3    | <0.001      | 1.27 - 1.33 |
|                                         |                          | Male               | Ref    |             |             |
|                                         | District                 | North              | 1.05   | 0.001       | 1.02 - 1.08 |
|                                         |                          | South              | 0.92   | <0.001      | 0.89 - 0.96 |
|                                         |                          | Gaza envelope      | 0.86   | <0.001      | 0.8 - 0.93  |
|                                         |                          | Center             | Ref    |             |             |
|                                         | SES                      | Low                | 0.97   | 0.108       | 0.94 - 1.01 |
|                                         |                          | Medium             | Ref    |             |             |
|                                         |                          | High               | 1.05   | <0.000      | 1.03 - 1.07 |
|                                         | Socio-religious sector   | Ultra-Orthodox Jew | 1.15   | <0.001      | 1.1 - 1.21  |
|                                         |                          | Arab               | 0.77   | <0.001      | 0.72 - 0.83 |
|                                         |                          | General Jewish     | Ref    |             |             |
|                                         | Use of psychiatric drugs | Yes                | 1.84   | <0.001      | 1.8 - 1.88  |
| No                                      |                          | Ref                |        |             |             |
| Armed conflict                          | Second Lebanon War       | 1.33               | 0.121  | 0.93 - 1.91 |             |
|                                         | Military operation       | 1.13               | 0.152  | 0.96 - 1.33 |             |
|                                         | October 7th              | 2.6                | <0.001 | 2.18 - 3.1  |             |
| Interaction with the Second Lebanon War | Biological sex           | Female             | 1.18   | 0.406       | 0.8 - 1.72  |
|                                         |                          | Male               | Ref    |             |             |
|                                         | District                 | North              | 0.81   | 0.456       | 0.46 - 1.42 |
|                                         |                          | South              | 1.55   | 0.181       | 0.82 - 2.96 |
|                                         |                          | Gaza envelope      | 0.88   | 0.900       | 0.12 - 6.31 |
|                                         |                          | Center             | Ref    |             |             |
|                                         | Socio-religious sector   | Ultra-Orthodox Jew | 1.21   | 0.48        | 0.71 - 2.07 |
|                                         |                          | Arab               | 0.96   | 0.959       | 0.23 - 4.05 |
| General Jewish                          |                          | Ref                |        |             |             |
| Interaction with Military operation     | Biological sex           | Female             | 1.18   | 0.073       | 0.99 - 1.41 |
|                                         |                          | Male               | Ref    |             |             |
|                                         | District                 | North              | 1.14   | 0.254       | 0.91 - 1.42 |
|                                         |                          | South              | 1.13   | 0.393       | 0.86 - 1.49 |
|                                         |                          | Gaza envelope      | 1.38   | 0.226       | 0.82 - 2.32 |
|                                         |                          | Center             | Ref    |             |             |
|                                         | Socio-religious sector   | Ultra-Orthodox Jew | 0.84   | 0.314       | 0.59 - 1.19 |
|                                         |                          | Arab               | 0.72   | 0.294       | 0.39 - 1.33 |
| General Jewish                          |                          | Ref                |        |             |             |
| Interaction with October 7th            | Biological sex           | Female             | 1.91   | <0.001      | 1.58 - 2.3  |
|                                         |                          | Male               | Ref    |             |             |

|                        |                    |      |       |             |
|------------------------|--------------------|------|-------|-------------|
|                        | North              | 1.05 | 0.658 | 0.85 - 1.29 |
| District               | South              | 1.09 | 0.471 | 0.86 - 1.39 |
|                        | Gaza envelope      | 1.4  | 0.114 | 0.92 - 2.12 |
|                        | Center             | Ref  |       |             |
|                        | Ultra-Orthodox Jew | 0.5  | 0.001 | 0.33 - 0.75 |
| Socio-religious sector | Arab               | 0.35 | 0.007 | 0.17 - 0.75 |
|                        | General Jewish     | Ref  |       |             |



**Table S15.** Cox regression analysis with adjusted Hazard Ratios (HRs) for renewed purchases of anxiolytic medications (secondary analysis) between 2006-2024, ages 60 or older.

|                                         | Variable                 | Category           | HR     | P-value     | 95%CI       |
|-----------------------------------------|--------------------------|--------------------|--------|-------------|-------------|
| Baseline                                | Biological sex           | Female             | 1.18   | <0.001      | 1.14 - 1.23 |
|                                         |                          | Male               | Ref    |             |             |
|                                         | District                 | North              | 0.97   | 0.388       | 0.92 - 1.04 |
|                                         |                          | South              | 0.94   | 0.228       | 0.85 - 1.04 |
|                                         |                          | Gaza envelope      | 0.75   | 0.035       | 0.57 - 0.98 |
|                                         |                          | Center             | Ref    |             |             |
|                                         | SES                      | Low                | 0.99   | 0.902       | 0.91 - 1.09 |
|                                         |                          | Medium             | Ref    |             |             |
|                                         |                          | High               | 1.05   | 0.015       | 1.01 - 1.08 |
|                                         | Socio-religious sector   | Ultra-Orthodox Jew | 1.06   | 0.242       | 0.96 - 1.16 |
|                                         |                          | Arab               | 0.92   | 0.32        | 0.77 - 1.09 |
|                                         |                          | General Jewish     | Ref    |             |             |
|                                         | Use of psychiatric drugs | Yes                | 1.45   | <0.001      | 1.39 - 1.52 |
|                                         |                          | No                 | Ref    |             |             |
| Armed conflict                          | Second Lebanon War       | 1.57               | 0.069  | 0.97 - 2.55 |             |
|                                         | Military operation       | 1.3                | 0.058  | 0.99 - 1.71 |             |
|                                         | October 7th              | 2.13               | <0.001 | 1.38 - 3.27 |             |
| Interaction with the Second Lebanon War | Biological sex           | Female             | 1.07   | 0.805       | 0.64 - 1.8  |
|                                         |                          | Male               | Ref    |             |             |
|                                         | District                 | North              | 1.82   | 0.078       | 0.94 - 3.56 |
|                                         |                          | South              | 0.64   | 0.663       | 0.09 - 4.66 |
|                                         |                          | Gaza envelope      | -      | -           | -           |
|                                         |                          | Center             | Ref    |             |             |
|                                         | Socio-religious sector   | Ultra-Orthodox Jew | 0.9    | 0.841       | 0.33 - 2.48 |
|                                         |                          | Arab               | -      | -           | -           |
| General Jewish                          |                          | Ref                |        |             |             |
| Interaction with Military operation     | Biological sex           | Female             | 1.04   | 0.792       | 0.77 - 1.42 |
|                                         |                          | Male               | Ref    |             |             |
|                                         | District                 | North              | 1.29   | 0.26        | 0.83 - 2.02 |
|                                         |                          | South              | 1.63   | 0.157       | 0.83 - 3.21 |
|                                         |                          | Gaza envelope      | 2.41   | 0.226       | 0.58 - 9.95 |
|                                         |                          | Center             | Ref    |             |             |
|                                         | Socio-religious sector   | Ultra-Orthodox Jew | 0.69   | 0.241       | 0.38 - 1.28 |
|                                         |                          | Arab               | 0.35   | 0.3         | 0.05 - 2.56 |
| General Jewish                          |                          | Ref                |        |             |             |
| Interaction with October 7th            | Biological sex           | Female             | 1.42   | 0.144       | 0.89 - 2.27 |
|                                         |                          | Male               | Ref    |             |             |

|                        |                    |      |       |             |
|------------------------|--------------------|------|-------|-------------|
|                        | North              | 0.74 | 0.435 | 0.34 - 1.59 |
| District               | South              | 1.07 | 0.891 | 0.39 - 2.94 |
|                        | Gaza envelope      | -    | -     | -           |
|                        | Center             | Ref  |       |             |
|                        | Ultra-Orthodox Jew | 0.74 | 0.483 | 0.32 - 1.7  |
| Socio-religious sector | Arab               | -    | -     | -           |
|                        | General Jewish     | Ref  |       |             |

**Table S16.** Exposure negative control analysis. Cox regression analysis with adjusted Hazard Ratios (HRs) for first purchases of anxiolytic medications during shifted dates of armed conflicts between 2006-2024.

|                                                  | Variable               | Category       | HR     | P-value     | 95%CI       |
|--------------------------------------------------|------------------------|----------------|--------|-------------|-------------|
| Baseline                                         | Age group, yr.         | 25-39          | 1.23   | <0.001      | 1.2 - 1.26  |
|                                                  |                        | 40-59          | 1.62   | <0.001      | 1.58 - 1.67 |
|                                                  |                        | 60+            | 1.95   | <0.001      | 1.89 - 2.02 |
|                                                  |                        | 21-24          | Ref    |             |             |
|                                                  | Biological sex         | Female         | 1.33   | <0.001      | 1.32 - 1.35 |
|                                                  |                        | Male           | Ref    |             |             |
|                                                  | District               | North          | 1.03   | <0.001      | 1.02 - 1.05 |
|                                                  |                        | South          | 0.89   | <0.001      | 0.88 - 0.91 |
|                                                  |                        | Gaza envelope  | 0.80   | <0.001      | 0.78 - 0.83 |
|                                                  |                        | Center         | Ref    |             |             |
|                                                  | SES                    | Low            | 0.96   | <0.001      | 0.95 - 0.98 |
|                                                  |                        | Medium         | Ref    |             |             |
|                                                  |                        | High           | 1.02   | 0.002       | 1.01 - 1.03 |
|                                                  | Socio-religious sector | Ultra-Orthodox |        |             |             |
|                                                  |                        | Jew            | 0.94   | <0.001      | 0.92 - 0.96 |
| Arab                                             |                        | 0.73           | <0.001 | 0.7 - 0.75  |             |
| General Jewish                                   |                        | Ref            |        |             |             |
| Use of psychiatric drugs                         | Yes                    | 3.30           | <0.001 | 3.26 - 3.33 |             |
|                                                  | No                     | Ref            |        |             |             |
| Negative Control                                 | Yes                    | 0.95           | 0.033  | 0.91 - 1    |             |
|                                                  | No                     | Ref            |        |             |             |
| Interaction with Negative Control Exposure (NCE) | Biological sex         | Female         | 0.99   | 0.579       | 0.94 - 1.04 |
|                                                  |                        | Male           | Ref    |             |             |
|                                                  | District               | North          | 1.05   | 0.203       | 0.98 - 1.12 |
|                                                  |                        | South          | 1.00   | 0.967       | 0.92 - 1.09 |
|                                                  |                        | Gaza envelope  | 0.87   | 0.092       | 0.74 - 1.02 |
|                                                  |                        | Center         | Ref    |             |             |
|                                                  | Socio-religious sector | Ultra-Orthodox |        |             |             |
|                                                  |                        | Jew            | 0.99   | 0.896       | 0.91 - 1.09 |
|                                                  |                        | Arab           | 1.04   | 0.539       | 0.91 - 1.19 |
|                                                  |                        | General Jewish | Ref    |             |             |

**Table S17.** Exposure negative control analysis. Cox regression analysis with adjusted Hazard Ratios (HRs) for renewed purchases of anxiolytic medications during shifted dates of armed conflicts between 2006-2024.

|                                                  | Variable               | Category       | HR    | P-value     | 95%CI       |
|--------------------------------------------------|------------------------|----------------|-------|-------------|-------------|
| Baseline                                         | Age group, yr.         | 25-39          | 1.04  | 0.003       | 1.01 - 1.07 |
|                                                  |                        | 40-59          | 1.18  | 0.00        | 1.14 - 1.21 |
|                                                  |                        | 60+            | 1.29  | 0.00        | 1.25 - 1.33 |
|                                                  |                        | 21-24          | Ref   |             |             |
|                                                  | Biological sex         | Female         | 1.21  | 0.00        | 1.19 - 1.23 |
|                                                  |                        | Male           | Ref   |             |             |
|                                                  | District               | North          | 1.04  | 0.00        | 1.02 - 1.05 |
|                                                  |                        | South          | 0.93  | 0.00        | 0.9 - 0.95  |
|                                                  |                        | Gaza envelope  | 0.85  | 0.00        | 0.81 - 0.89 |
|                                                  |                        | Center         | Ref   |             |             |
|                                                  | SES                    | Low            | 0.99  | 0.260       | 0.97 - 1.01 |
|                                                  |                        | Medium         | Ref   |             |             |
|                                                  |                        | High           | 1.04  | 0.00        | 1.03 - 1.06 |
|                                                  | Socio-religious sector | Ultra-Orthodox |       |             |             |
|                                                  |                        | Jew            | 1.07  | 0.00        | 1.04 - 1.1  |
| Arab                                             |                        | 0.82           | 0.00  | 0.78 - 0.85 |             |
| General Jewish                                   |                        | Ref            |       |             |             |
| Use of psychiatric drugs                         | Yes                    | 1.97           | 0.00  | 1.94 - 2    |             |
|                                                  | No                     | Ref            |       |             |             |
| Negative Control                                 | Yes                    | 0.98           | 0.406 | 0.92 - 1.04 |             |
|                                                  | No                     | Ref            |       |             |             |
| Interaction with Negative Control Exposure (NCE) | Biological sex         | Female         | 1.01  | 0.708       | 0.95 - 1.08 |
|                                                  |                        | Male           | Ref   |             |             |
|                                                  | District               | North          | 0.94  | 0.159       | 0.85 - 1.03 |
|                                                  |                        | South          | 1.03  | 0.666       | 0.92 - 1.14 |
|                                                  |                        | Gaza envelope  | 1.14  | 0.229       | 0.92 - 1.4  |
|                                                  |                        | Center         | Ref   |             |             |
|                                                  | Socio-religious sector | Ultra-Orthodox |       |             |             |
|                                                  |                        | Jew            | 1.03  | 0.684       | 0.91 - 1.16 |
|                                                  |                        | Arab           | 0.92  | 0.460       | 0.75 - 1.14 |
|                                                  |                        | General Jewish | Ref   |             |             |
